# Supplementary material
Source: PubMed Central journal article supplement (PMC7964764)
Supplement: 3044_table.pdf [file 3044_table.pdf]

**On-line Table: Characteristics of patients with HCA**

| Patient | Sex | Age (yr) | Occlusion | Intravenous Therapy | Recanalization | Clinical Evolution after IA Therapy (NIHSS) |                 | HCA Location                                                                                                             | HCA Evolution in Follow-Up CT | NIHSS at Discharge |
|---------|-----|----------|-----------|---------------------|----------------|---------------------------------------------|-----------------|--------------------------------------------------------------------------------------------------------------------------|-------------------------------|--------------------|
|         |     |          |           |                     |                | Preprocedural–NIHSS                         | Postprocedural) |                                                                                                                          |                               |                    |
| 1       | M   | 60       | LEICA     | Yes                 | Incomplete     | 8–6                                         |                 | SA (frontoparietal left sulci)                                                                                           | Disappearance                 | 4                  |
| 2       | F   | 76       | RMCA      | No                  | Complete       | 8–0                                         |                 | SA (suprasellar and perimesencephalic cisterns, and right Sylvian fissure)                                               | Decrease                      | 0                  |
| 3       | M   | 80       | REICA     | No                  | Complete       | 14–5                                        |                 | SA (frontotemporal right and posterior interhemispheric sulci)<br>BP (left lenticular and caudate nucleus, and thalamus) | Decrease                      | 3                  |
| 4       | M   | 57       | LEICA     | Yes                 | Complete       | 19–17                                       |                 | SA (frontotemporoparietal left sulci)                                                                                    | Decrease                      | 9                  |
| 5       | M   | 81       | LEICA     | Yes                 | Incomplete     | 18–2                                        |                 | BP (right lenticular and caudate nucleus)                                                                                | Decrease                      | 2                  |
| 6       | M   | 67       | RIICA     | No                  | Complete       | 19–8                                        |                 | SA (frontotemporoparietal right sulci)                                                                                   | Disappearance                 | 5                  |
| 7       | F   | 37       | LMCA      | Yes                 | Complete       | 14–2                                        |                 | BP (left lenticular and caudate nucleus)                                                                                 | Disappearance                 | 0                  |
| 8       | F   | 80       | RMCA      | Yes                 | Complete       | 9–4                                         |                 | SA (frontotemporal right sulci)                                                                                          | Disappearance                 | 4                  |
| 9       | F   | 45       | LMCA      | No                  | Incomplete     | 5–5                                         |                 | SA (parietal left sulci)<br>BP (left lenticular and caudate nucleus)                                                     | Decrease                      | 5                  |
| 10      | M   | 54       | REICA     | No                  | Complete       | 18–5                                        |                 | SA (suprasellar cistern and frontotemporal right sulci)<br>BP (right caudate, lenticular and thalamus)                   | Decrease                      | 4                  |
| 11      | M   | 39       | REICA     | No                  | Complete       | 20–6                                        |                 | BP (right caudate and lenticular nucleus)                                                                                | Disappearance                 | 1                  |
| 12      | F   | 73       | LMCA      | Yes                 | Complete       | 24–24                                       |                 | SA (frontal left sulci)<br>BP (left caudate and lenticular nucleus)                                                      | Disappearance                 | Death              |
| 13      | F   | 79       | RMCA      | Yes                 | Complete       | 15–3                                        |                 | SA (frontotemporal right sulci)                                                                                          | Disappearance                 | 1                  |
| 14      | M   | 81       | LIICA     | No                  | Complete       | 12–6                                        |                 | SA (frontal right sulci)<br>BP (right caudate and lenticular nucleus)                                                    | Disappearance                 | 6                  |
| 15      | M   | 81       | LMCA      | No                  | Complete       | 24–7                                        |                 | SA (frontal left sulci)<br>BP (left caudate and lenticular nucleus)                                                      | Disappearance                 | 5                  |

**Note:**—IA indicates intra-arterial; LEICA, left extra- and intracranial segments of the ICA; REICA, right extra- and intracranial segments of the ICA; LIICA, left intracranial segment of the ICA; RIICA, right intracranial segment of the ICA; LMCA, left middle cerebral artery; RMCA, right middle cerebral artery; SA, subarachnoid; BP, brain parenchyma.
